# Supplementary material for: Switchable tribo-electromagnetic composite generator based on magnetic-spring dynamic coupling for low-velocity flow energy harvesting
Source: Royal Society of Chemistry journal article supplement (doi:10.1039/d5se01024a), 2026-01-01
Supplement: d5se01024a1.pdf [file d5se01024a1.pdf]

# Switchable Tribo-Electromagnetic Composite Generator Based on Magnetic-Spring Dynamic Coupling for Low-Velocity Flow Energy Harvesting

**Da Che<sup>a</sup>, Xiao Zhang<sup>a,\*</sup>, Guanzheng Xu<sup>a</sup>, Yanhui Wang<sup>a</sup>, Futian Geng<sup>a</sup>, Siyu Zhang<sup>a</sup>, Fei Zhong<sup>a</sup>, Wanqiang Zhu<sup>b,\*</sup>**

<sup>a</sup>*School of Energy and Power Engineering, Changchun Institute of Technology, Changchun, Jilin 130012, China.* <sup>b</sup>*School of Physics, Northeast Normal University, Changchun 130024, China.*

\* Corresponding authors' e-mail addresses: [sonic4222001@163.com](mailto:sonic4222001@163.com) [zhuwq773@nenu.edu.cn](mailto:zhuwq773@nenu.edu.cn)

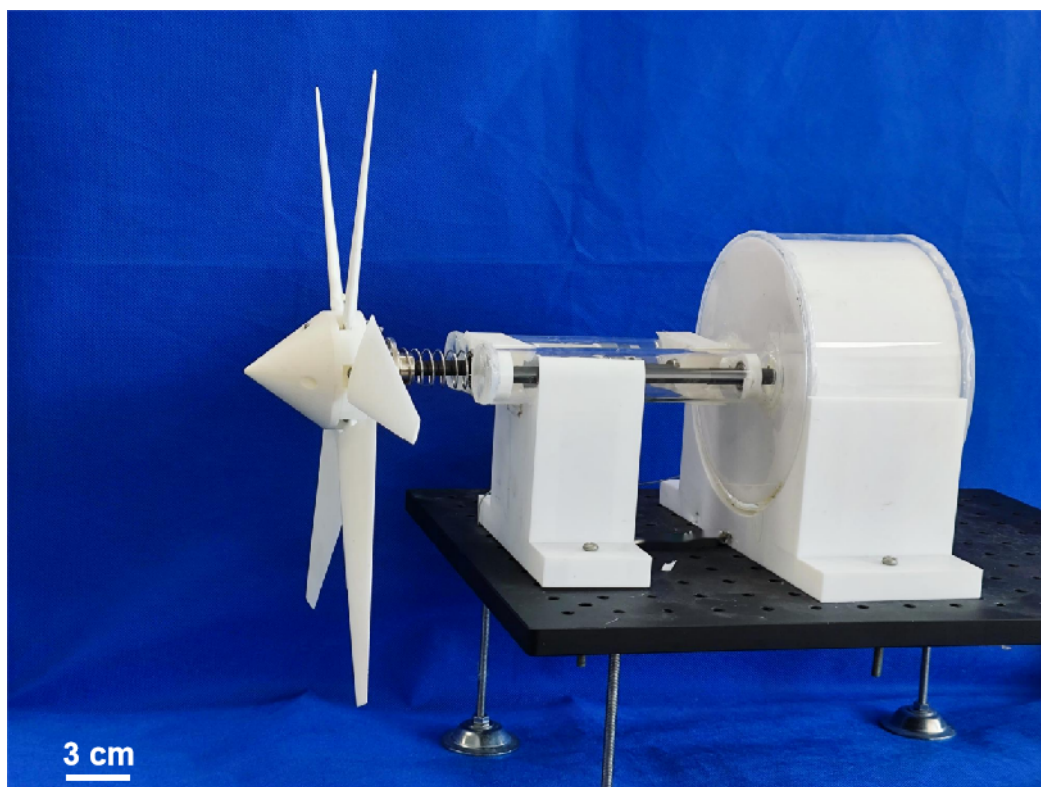

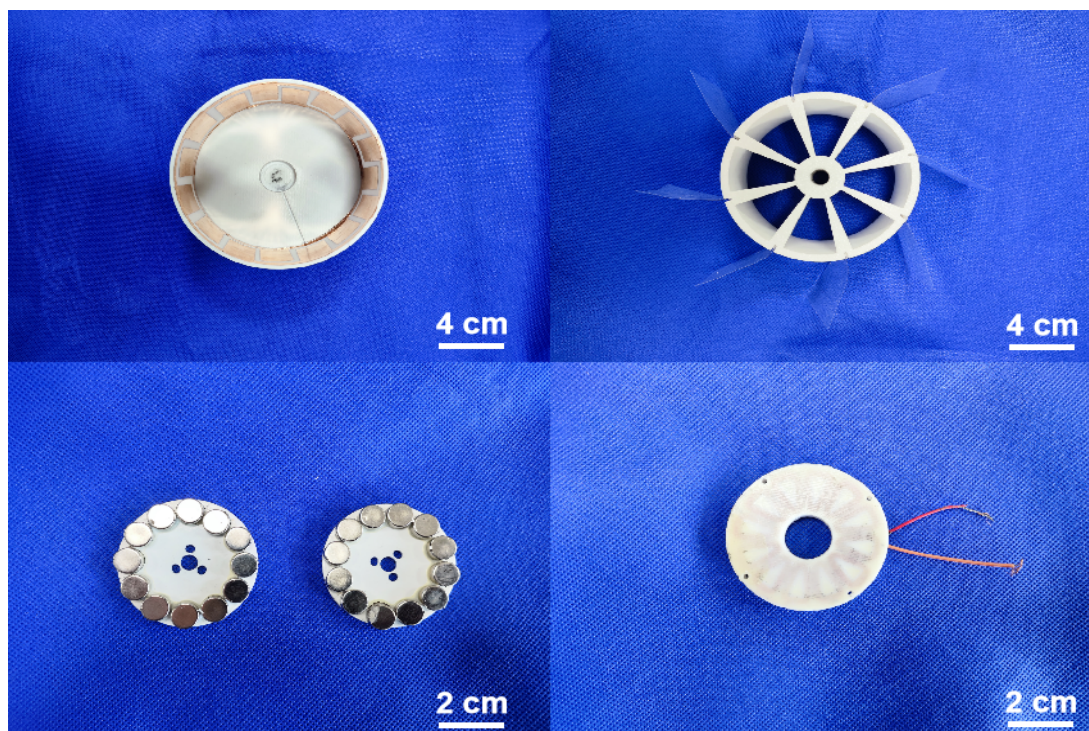

**Figure S1** Overall view of the SEHCG assembly. TENG stator component. TENG rotor component. EMG dual-disk structure. Sealed EMG coil module.

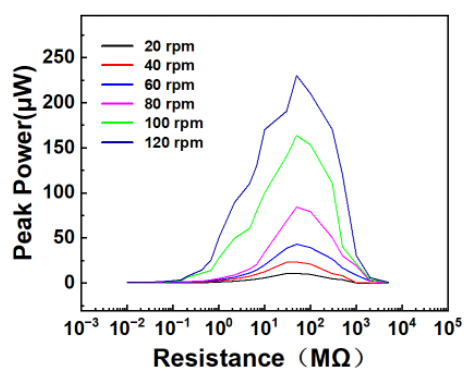

**Figure S2** Peak power output of TENG at different rotational speeds

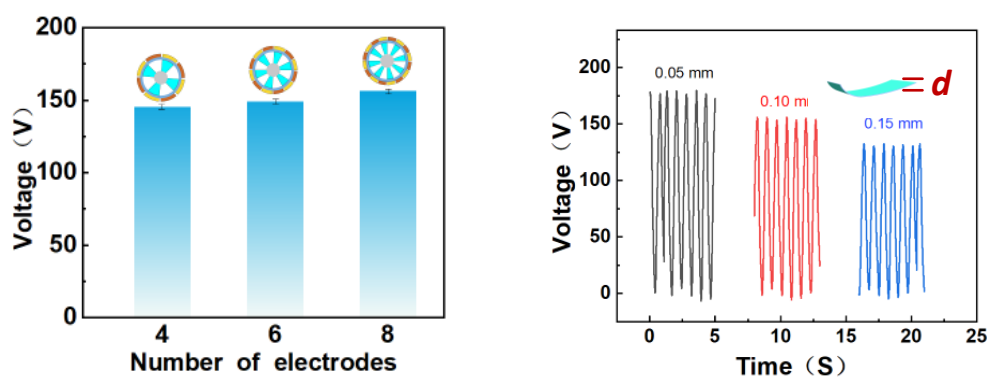

**Figure S3** Performance comparison under varying numbers of magnetic pole pairs. Output performance vs. triboelectric film thickness

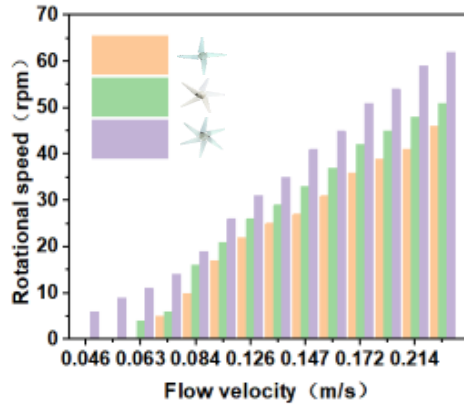

**Figure S4** Starting flow velocity with varying numbers of blades

|                          |                                                         |                                                                 |
|--------------------------|---------------------------------------------------------|-----------------------------------------------------------------|
| <b>Feature</b>           | Simultaneous Hybrid Generators (Reported in Literature) | Switchable Hybrid Generator (This Work)                         |
| <b>Operational Mode</b>  | TENG and EMG work simultaneously                        | TENG and EMG work in a time-shared manner, switching adaptively |
| <b>Primary Objective</b> | Achieve superposition of instantaneous output power     | Extend the effective operating flow/energy range                |
| <b>Ideal Application</b> | Environments with stable and sufficient energy input    | Environments with highly variable and often low energy input    |

**Table S1. Conceptual Comparison Between Simultaneous and Switchable Hybrid Generators**
